# Supplementary material for: Face Mask Use and Social Distancing Attitude of Healthcare Students: A Multi-Disciplinary Study
Source: MDPI journal article supplement (doi:10.3390/healthcare11060901), 2023-03-21
Supplement: s1 [file s1]

Supplementary Table S1 Results of the descriptive analyses on the study variables (n = 543)

| Variable                              | Mean | SD   | Lowest | Highest |
|---------------------------------------|------|------|--------|---------|
| Risk perceptions on COVID-19          | 3.09 | 0.94 | 1.00   | 5.00    |
| Fear of COVID-19                      | 3.23 | 1.09 | 1.00   | 5.00    |
| Face mask use knowledge               | 3.36 | 1.57 | 0.00   | 7.00    |
| Face mask use attitudes               | 1.78 | 3.99 | -11.00 | 11.00   |
| Face mask use practice                | 7.46 | 3.96 | 0.00   | 12.00   |
| Social distancing attitudes (Overall) | 3.12 | 0.42 | 2.05   | 4.47    |
| Social distancing positive attitudes  | 3.39 | 0.96 | 1.00   | 5.00    |
| Social distancing negative attitudes  | 2.84 | 0.92 | 1.00   | 5.00    |

Supplementary Table S2 Descriptive analyses results of the risk perceptions and fear of COVID-19 (n = 543)

| Risk perceptions                                                                                                                                      | Very unlikely<br>n (%)     | Unlikely<br>n (%) | Neutral<br>n (%) | Likely<br>n (%) | Very likely<br>n (%)    | Mean<br>(SD)   |
|-------------------------------------------------------------------------------------------------------------------------------------------------------|----------------------------|-------------------|------------------|-----------------|-------------------------|----------------|
| How likely do you think it is that you might become infected with COVID-19 (Coronavirus SARS-CoV-2) in the near future?                               | 69<br>(12.7)               | 105<br>(19.3)     | 215<br>(39.6)    | 75<br>(13.8)    | 79<br>(14.5)            | 2.98<br>(1.19) |
| How likely do you think it is that people in your family and friends might become infected with COVID-19 (Coronavirus SARS-CoV-2) in the near future? | 45 (8.3)                   | 107<br>(19.7)     | 222<br>(40.9)    | 108<br>(19.9)   | 61<br>(11.2)            | 3.06<br>(1.08) |
| How likely do you think it is to get COVID-19 (Coronavirus SARS-CoV-2) in general?                                                                    | 31 (5.7)                   | 88<br>(16.2)      | 232<br>(42.7)    | 106<br>(19.5)   | 86<br>(15.8)            | 3.24<br>(1.08) |
| Fear of COVID-19                                                                                                                                      | Strongly disagree<br>n (%) | Disagree<br>n (%) | Neutral<br>n (%) | Agree<br>n (%)  | Strongly agree<br>n (%) |                |
| The COVID-19 (Coronavirus SARS-CoV-2) worries me.                                                                                                     | 50 (9.2)                   | 77<br>(14.2)      | 172<br>(31.7)    | 146<br>(26.9)   | 98<br>(18.0)            | 3.30<br>(1.19) |
| I am afraid of being infected by COVID-19 (Coronavirus SARS-CoV-2).                                                                                   | 64<br>(11.8)               | 89<br>(16.4)      | 170<br>(31.3)    | 133<br>(24.5)   | 87<br>(16.0)            | 3.17<br>(1.22) |

Supplementary Table S3 Descriptive analyses results on the knowledge of the correction use of face mask (n = 543)

| Variable                                                                                                | With correct answers<br>n (%) | With incorrect answers<br>n (%) |
|---------------------------------------------------------------------------------------------------------|-------------------------------|---------------------------------|
| To wear a face mask correctly, the mask should cover?                                                   | 255 (47.0)                    | 288 (53.0)                      |
| What is the purpose of the metal strip on the facial mask?                                              | 372 (68.5)                    | 171 (31.5)                      |
| Which side of the mask should face outside?                                                             | 164 (30.2)                    | 379 (69.8)                      |
| When wearing a face mask at the clinic, there is no need to cover your mouth when sneezing or coughing. | 329 (60.6)                    | 214 (39.4)                      |
| A cloth facial mask is as effective as a regular surgical facial mask.                                  | 214 (39.4)                    | 329 (60.6)                      |
| If I am not sick, the used face mask can be stored in a bag for later use.                              | 333 (61.3)                    | 210 (38.7)                      |
| A facial mask helps to prevent human immunodeficiency virus.                                            | 157 (28.9)                    | 386 (71.1)                      |

Supplementary Table S4 Descriptive analyses results on the attitudes towards face mask use (n = 543)

| Variables                                                                                            | Strongly disagree/<br>Disagree<br>n (%) | Uncertain<br>n (%) | Strongly agree/<br>Agree<br>n (%) |
|------------------------------------------------------------------------------------------------------|-----------------------------------------|--------------------|-----------------------------------|
| Perceived susceptibility to ILI                                                                      |                                         |                    |                                   |
| I am more susceptible to ILI at the clinic than in public venues                                     | 185 (34.1)                              | 180 (33.1)         | 178 (32.8)                        |
| There is a high chance of having ILI transmitted to me while I am at the clinic                      | 163 (30.0)                              | 158 (27.1)         | 222 (40.9)                        |
| I feel that I am susceptible to getting ILI at the clinic                                            | 160 (29.5)                              | 173 (31.9)         | 210 (38.7)                        |
| I feel that since the SARS and H1N1 crises are over, I no longer have to worry about contracting ILI | 190 (35.0)                              | 190 (35.0)         | 163 (30.0)                        |
| Perceived severity of ILI                                                                            |                                         |                    |                                   |
| I believe that getting ILI is serious                                                                | 151 (27.8)                              | 147 (27.1)         | 245 (45.1)                        |
| Having ILI will be troublesome for me as I have to take time off work                                | 151 (27.8)                              | 181 (33.3)         | 211 (38.9)                        |
| I feel that if I get ILI, I will recover quickly                                                     | 166 (30.6)                              | 163 (30.0)         | 214 (39.4)                        |
| Having ILI will be troublesome for me as I may spread it to loved ones                               | 135 (24.9)                              | 141 (26.0)         | 267 (49.2)                        |
| Perceived benefits of wearing a face mask                                                            |                                         |                    |                                   |
| At the clinic, wearing a face mask cannot prevent the transmission of ILI.                           | 180 (33.1)                              | 135 (24.9)         | 228 (42.0)                        |
| I believe that wearing a face mask is a good way to protect myself against ILI at the clinic.        | 120 (22.1)                              | 129 (23.8)         | 294 (54.1)                        |
| Perceived barriers to wearing a face mask                                                            |                                         |                    |                                   |
| I will only wear a face mask at the clinic if it is free                                             | 309 (56.9)                              | 107 (19.7)         | 127 (23.4)                        |
| Buying a face mask at the clinic is expensive                                                        | 257 (47.3)                              | 169 (31.1)         | 117 (21.5)                        |
| Wearing a face mask is troublesome because I cannot communicate properly                             | 231 (42.5)                              | 156 (28.7)         | 156 (28.7)                        |
| I would feel ashamed if I was the only person wearing a face mask at the clinic                      | 310 (57.1)                              | 123 (22.7)         | 110 (20.3)                        |
| It is easier to wear a face mask if everyone at the clinic is wearing one too                        | 176 (32.4)                              | 122 (22.5)         | 245 (45.1)                        |
| Cues to action                                                                                       |                                         |                    |                                   |
| I would wear a face mask if there were more posters to remind me                                     | 202 (37.2)                              | 140 (25.8)         | 201 (37.0)                        |
| If the doctor tells me to, I will wear a face mask                                                   | 181 (33.3)                              | 104 (19.2)         | 258 (47.5)                        |
| If the nurse tells me to, I will wear a face mask                                                    | 142 (26.2)                              | 125 (23.0)         | 276 (50.8)                        |
| Self-efficacy                                                                                        |                                         |                    |                                   |
| I know the proper steps for putting on a face mask                                                   | 163 (30.0)                              | 73 (13.4)          | 307 (56.5)                        |

Note. ILI means Influenza-like illness

Supplementary Table S5 Descriptive analyses results of the practices on the use of face masks (n = 543)

| Variable                                                                 | Never/<br>Rarely<br>n (%) | Sometimes<br>n (%) | Frequently/<br>Always<br>n (%) |
|--------------------------------------------------------------------------|---------------------------|--------------------|--------------------------------|
| I wear a facial mask in public venues to protect myself against ILI.     | 145 (26.7)                | 113 (20.8)         | 285 (52.5)                     |
| I wear a facial mask in a doctor's clinic to protect myself against ILI. | 112 (20.6)                | 138 (25.4)         | 293 (54.0)                     |
| I wear a facial mask at home when I have symptoms of ILI.                | 193 (35.5)                | 156 (28.7)         | 194 (35.7)                     |
| I wear a facial mask in public venues when I have symptoms of ILI.       | 108 (19.9)                | 150 (27.6)         | 285 (52.5)                     |
| I wear a facial mask in a doctor's clinic when I have symptoms of ILI.   | 116 (21.4)                | 115 (21.2)         | 312 (57.5)                     |
| I wear a facial mask at home when family members have ILI.               | 147 (27.1)                | 149 (27.4)         | 247 (45.5)                     |

Note. ILI means Influenza-like illness

Supplementary Table S6 Descriptive analyses result on the attitudes toward social distancing (n = 543)

| Variable                                                                                                                | Strongly disagree/<br>Disagree<br>n (%) | Uncertain<br>n (%) | Strongly agree/ Agree<br>n (%) |
|-------------------------------------------------------------------------------------------------------------------------|-----------------------------------------|--------------------|--------------------------------|
| Positive attitudes                                                                                                      |                                         |                    |                                |
| Social distancing has slowed the spread of coronavirus                                                                  | 152 (22.8)                              | 132 (24.3)         | 287 (52.9)                     |
| Social distancing makes me feel safer.                                                                                  | 137 (25.2)                              | 123 (22.7)         | 283 (52.1)                     |
| It is our duty as good citizens to follow social distance orders.                                                       | 137 (25.2)                              | 123 (22.7)         | 283 (52.1)                     |
| For social distancing to be effective, we need everyone to follow the rules.                                            | 108 (19.9)                              | 122 (22.5)         | 313 (57.6)                     |
| Stopping social distancing to soon will likely lead to another outbreak of coronavirus.                                 | 141 (26.0)                              | 175 (32.2)         | 227 (41.8)                     |
| We need to have better ways to test and track people with coronavirus before we can safely lift social distance orders. | 117 (21.5)                              | 179 (33.0)         | 247 (45.5)                     |
| We should not lift social distance orders until there is a steady decline in the number of coronavirus cases.           | 121 (22.3)                              | 160 (29.5)         | 262 (48.3)                     |
| We should not lift social distance orders if hospitals are full of coronavirus patients.                                | 126 (23.2)                              | 139 (25.6)         | 278 (51.2)                     |
| Negative attitudes                                                                                                      |                                         |                    |                                |
| Social distancing is not really doing much good.                                                                        | 264 (48.6)                              | 133 (24.5)         | 146 (26.9)                     |
| Social distancing is doing more harm than good.                                                                         | 261 (48.1)                              | 128 (23.6)         | 154 (28.4)                     |
| Social distance orders violate my individual rights.                                                                    | 222 (40.9)                              | 173 (31.9)         | 148 (27.3)                     |
| Social distancing should be a matter of personal choice.                                                                | 225 (41.4)                              | 148 (27.3)         | 170 (31.3)                     |
| Most places in the country can safely stop social distancing.                                                           | 156 (28.7)                              | 188 (34.6)         | 199 (36.6)                     |
| We can lift most social distance orders and still keep coronavirus under control.                                       | 162 (29.8)                              | 180 (33.1)         | 201 (37.0)                     |
